# Supplementary material for: A lightweight NO 2 -to-NO x conversion model for quantifying NO x emissions of point sources from NO 2 satellite observations
Source: Copernicus journal article supplement (doi:10.5194/acp-24-7667-2024), 2024-07-05
Supplement: Supplementary file 1 [file acp-24-7667-2024-supplement.zip]

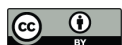

*Supplement of*

## **A lightweight NO<sub>2</sub>-to-NO<sub>x</sub> conversion model for quantifying NO<sub>x</sub> emissions of point sources from NO<sub>2</sub> satellite observations**

**Sandro Meier et al.**

*Correspondence to:* Sandro Meier (sandro.meier@empa.ch) and Gerrit Kuhlmann (gerrit.kuhlmann@empa.ch)

- acp-24-7667-2024-supplement-title-page.pdf
- Matimba\_S5P\_RPRO\_L2\_\_NO2\_\_\_\_20210725T110715.nc
- Meier\_et\_al\_2024\_supplement.pdf
- example\_tropomi\_no2\_to\_nox\_conversion.ipynb

The copyright of individual parts of the supplement might differ from the article licence.
